# Supplementary material for: The role of serum and urinary biomarkers in the diagnosis of early diabetic nephropathy in patients with type 2 diabetes
Source: PeerJ. 2019 Jun 11;7:e7079. doi: 10.7717/peerj.7079 (PMC6568248; doi:10.7717/peerj.7079)
Supplement: Supplemental Information 2 — Raw data showed gender, age, duration of diabetes, fundus lesions,blood pressure,BMI,FBG,TC,TG,LDL,TBIL,Scr,CysC,eGFR,UA, NC,LC,NLR,HbA1c, Tf,NAG,IgG,α1MG,Ucr,PCX,NGAL,8-OHdG,TNF-α,IL-18and UACR index of all the participants in the normoalbuminuria group. [file peerj-07-7079-s002.xls]

## Sheet: Sheet1
Sex	Age	Duration	FBG	DR	SBP	DBP	BMI	TBIL	Cr	Cysc	eGFR	UA	TC	TG	LDL	N	N/L	L	HbA1c	NAG	α1MG	Tf	IgG	UACR	TNF-α	NGAL	IL-18	8-OHdG	PCX	uCr
F	73	20	11.16	1	149	76	30.39	21.7	104	0.8	59.04	340	4.76	2.13	1.8	2.74	1.66061	1.65	8.5	13.9	48.1	1.81	9.8	16.7	6.5	22.68	21.21	3.67	2.55	5.855
M	55	10	19.72	0	142	87	19.83	10.7	59	0.59	162.14	206	3.38	0.44	2	2.81	3.74667	0.75	11.4	15.8	87.9	1.85	3.69	20.2	7.12	30.56	35.25	5.89	3.77	7.377
F	54	16	4.8	1	90	70	20.2	9	55	0.67	130.94	360	4.1	0.95	2.61	2.49	1.02469	2.43	8.1	11	6	1.9	3.42	13.3	5.02	24.5	41.52	4.09	3.79	8.179
F	44	3	15.52	0	114	72	19.81	6.8	44	0.43	176.59	163	5.34	0.94	2.92	2.46	1.89231	1.3	10.5	1.8	<5.56	1.9	<3.42	26.3	6.37	10.28	18.47	7.99	3.12	4.102
M	60	15	15.12	0	125	82	24.84	18	93	0.79	94.22	220	4.54	0.79	2.98	3.49	1.83684	1.9	9.2	10.7	33.8	2.1	15.5	6.5	7.23	12.57	37.26	4.12	4.32	18.784
M	64	10	8.12	0	142	87	26.23	9.5	98	0.54	87.53	268	3.86	1.1	2.35	2.35	0.94	2.5	8	12	23.8	2	8.46	18.8	8.04	40.1	34.15	6.09	4.42	14.274
F	51	8	5.94	0	137	91	22.89	11.2	45	0.84	166.99	274	4.12	1.58	2.57	2.93	2.03472	1.44	5.6	16	15.2	1.85	5.09	12.7	9.12	20.5	18.22	5.28	5.06	8.295
F	56	6	5.98	0	107	69	24.03	14.7	73	0.39	93.74	286	5.07	2.35	3.27	6.73	7.31522	0.92	5.9	37.9	28.3	2.94	18.5	24.4	4.56	36.78	12.59	6.78	3.4	26.979
F	62	4	7.88	1	134	74	21.79	6.9	40	0.76	183.87	240	4.08	1.37	2.68	1.89	1.15244	1.64	8	11.6	10.7	2.1	<3.42	28.8	6.28	15.24	34.21	8.48	6.33	3.787
M	45	5	7.75	1	117	78	23.7	17	59	1.18	168.88	307	5.26	1.52	3.63	2.47	0.869718	2.84	8.8	11.9	6.12	1.76	<3.42	17.3	6.15	8.67	33.37	7.09	3.46	5.529
M	55	2	7.04	0	115	71	22.15	10.2	68	0.94	137.64	347	4.51	1.72	3.05	2.85	0.796089	3.58	8	19.6	22.9	1.82	<3.42	9.3	5.27	46.15	30.25	7.33	4.11	9.628
M	53	0.1	6.73	0	105	75	24.44	29.6	55	0.86	177.15	331	4.52	1.38	2.88	7.54	3.06504	2.46	8.4	9.6	5.56	1.9	3.42	24.8	4.05	26.26	50.19	5.04	2.98	4.153
F	46	4	12.75	1	155	109	28.25	16.7	53	0.55	141.18	227	4.47	2.89	2.86	3.24	1.3444	2.41	9.3	17.1	6.6	1.84	4.98	26.3	7.18	25.27	49.33	8.22	7.4	9.365
M	46	0.8	5.22	0	134	84	25.18	11	73	0.45	131.48	283	5.3	2.48	3.58	3.69	1.29474	2.85	8.6	11	10.5	1.9	<3.42	7.6	8.23	14.58	15.53	5.92	2.11	13.475
M	55	8	5.78	0	105	70	23.78	11.7	81	1.16	112.47	428	4.46	7.25	2.45	2.69	1.51977	1.77	7.4	29.1	37.1	1.8	6.29	6.9	4.9	11.38	17.26	4.16	3.65	9.112
M	37	13	5.67	0	125	84	22.49	16.8	80	0.56	123.64	221	4.71	0.98	3.09	5.92	1.70605	3.47	9.7	17.6	10.4	1.84	4.11	26.3	7.2	28.48	27.35	7.7	4.72	5.923
M	64	3	6.65	0	133	79	28.55	11.7	59	1	157.22	266	3.33	2.52	2.07	3.36	2.73171	1.23	7.2	16	24.9	1.9	4.45	8	6.4	19.28	38.23	7.69	4.77	12.316
F	44	7	13.74	0	121	87	24.3	9.3	48	1.23	159.72	189	5.02	0.94	3.5	4.49	1.53242	2.93	11.7	13.8	7.66	1.86	<3.42	12.9	7.16	21.47	36.73	6.52	3.49	7.512
F	51	10	9.83	0	127	75	26.84	15.5	57	1	127.12	318	6.68	1.82	4.46	3.7	1.32616	2.79	11.8	23.3	7	2.3	8.62	19	3.78	6.28	40.26	5.91	7.34	8.461
F	65	4	3.15	0	139	89	24.61	8.4	74	0.59	89.53	239	4.87	2.77	2.76	5.69	2.24901	2.53	6.5	11.36	10.5	1.9	3.92	11	9.26	26.5	41.61	8.22	3.21	9.921
M	64	10	11.35	0	150	76	24.38	13.1	87	0.65	74.51	203	3.08	0.37	1.44	5.74	9.25806	0.62	6.7	10.6	10.5	1.9	3.41	15.6	5.48	19.71	45.16	7.11	4.56	6.859
M	69	0.8	7.68	0	134	91	29.73	7.8	91	0.6	69.67	259	7.11	7.84	3.94	4.11	2.1746	1.89	11.4	11	17.9	2.1	3.42	21.1	6.07	18.38	16.24	3.47	5.2	7.622
F	49	0.5	8.21	0	120	81	24.56	10	56	0.89	130.79	245	4.57	3.83	2.78	3.03	2.00662	1.51	8.6	10.6	12	1.9	3.42	10.8	7.9	24.7	29.17	6.32	2.09	9.976
F	51	5	16.04	0	128	68	22.27	9.9	30	1.3	266.63	114	3.88	0.5	2.23	1.93	0.969849	1.99	9.9	9.8	6.17	1.9	3.6	14.6	8.5	20.6	28.15	5.26	6.23	7.001
M	34	3	7.07	1	107	75	21.46	6.8	57	0.76	186.03	276	4.11	2.07	2.2	5.18	1.47159	3.52	7.7	11	5.81	1.8	3.42	20.3	5.04	15.31	15.37	7	1.56	5.162
F	54	4	7.18	0	120	74	20.66	11.5	51	0.81	142.87	264	4.27	0.71	3	2.28	1.01333	2.25	8.3	10.5	5.52	1.7	3.42	20.2	4.35	30.5	30.53	3.59	2.98	5.241
M	53	6	6.38	0	130	89	26.7	11.8	83	0.86	110.18	428	4.05	0.95	2.43	2.12	0.726027	2.92	6.5	11.6	<5.56	1.9	<3.42	11.2	5.7	18.41	31.26	5.61	7.2	9.174
M	65	3	5.89	0	124	79	27.94	14.7	97	0.99	88.3	391	4.49	0.92	2.95	4.57	2.62644	1.74	6.3	11.8	7.2	1.9	3.41	15.3	7.9	15.46	41.23	6.35	5.27	6.844
F	27	4	11.84	0	117	73	23.93	14.7	51	0.63	164.45	267	4.36	0.83	3	2.03	0.732852	2.77	8.6	11.6	<5.56	1.85	<3.42	7.6	6.18	20.45	31.32	7.02	3.66	13.572
M	50	5	7.42	0	133	91	23.88	10.3	75	0.84	125.32	302	4.4	0.37	2.38	2.46	1.42197	1.73	7	11.7	6.83	1.8	<3.42	7	7.15	45.6	30.28	5.75	3.1	12.751
M	60	10	5.7	0	137	82	28.73	13	51	0.61	188.47	320	4.05	0.9	2.66	1.61	2.11842	0.76	5.5	10.5	5.86	1.8	3.42	10.6	3.05	19.4	38.15	6.06	4.64	9.718
M	63	3	6.3	0	133	88	23.23	13.8	92	0.31	70.08	305	3.74	1.51	2.27	3.54	3.72632	0.95	6.2	10.7	7.78	1.8	3.36	14.2	9.26	10.8	22.48	7.46	5.33	7.445
M	39	5	12.44	1	111	72	23.71	15.4	86	0.5	83.5	193	3.21	0.71	1.86	1.67	1.04375	1.6	11	11.8	21	1.9	3.41	5.8	6.72	27.8	24.33	3.07	6.25	18.5
F	51	4	5.11	1	130	79	26.45	8.2	49	0.76	151.36	277	5.99	1.56	3.95	2.57	1.06639	2.41	6.5	8.9	5.54	1.7	3.35	14.6	5.48	16.7	23.3	7.33	5.27	7.253
F	51	0.5	5.15	0	120	77	24.94	18.6	83	0.89	82.38	259	3.99	1.07	2.48	0.98	0.875	1.12	5.2	9.8	5.56	1.8	3.4	20.1	5.26	31.37	31.83	6.11	1.22	5.328
F	61	18	9.46	1	140	78	21.23	7.8	65	0.52	105.33	225	5.22	1.71	3.85	3.2	3.67816	0.87	7.4	10.4	15.2	2.26	5.24	14.8	6.74	10.28	36.16	9.61	4.19	8.923
F	63	0.1	6.44	1	152	86	30.26	9	60	0.64	114.77	233	4.36	1.02	2.74	2.78	1.57955	1.76	12	11.2	<5.56	1.8	<3.41	18.6	6.6	15.37	40.12	6.99	4.34	5.316
M	31	0.05	13.04	0	119	86	29.3	11.2	66	0.6	160.02	250	4.5	1.5	2	4.51	1.68284	2.68	11.2	11.9	23.1	2	14.9	15.7	5.78	17.27	21.57	4.27	2.26	20.485
M	54	4	6.78	1	118	78	27.22	8.1	116	0.86	74.58	343	4.57	0.69	2.83	3.18	1.47907	2.15	6.6	10.9	8.16	1.8	<3.42	7.6	7.49	25.16	20.19	5.62	6.21	13.603
M	69	18	7.47	1	137	64	24.74	23.7	84	0.86	103	340	2.85	0.83	1.65	3.66	3.15517	1.16	7.2	10.7	11.4	1.7	<3.42	16.7	8.38	29.7	48.72	4.23	12.21	5.809
M	54	10	10.88	0	109	74	25.16	8.7	95	1.4	93.91	301	5.25	1	3.5	3.93	1.91707	2.05	10.7	17.9	21	1.9	6.23	9.6	6.07	31.15	22.92	3.86	3.63	10.046
M	55	4	6.02	0	124	87	23.39	11.1	61	1	155.99	271	5.01	1.8	3.19	2.37	1.64583	1.44	6.8	13.5	24.8	1.86	3.77	10.7	8.38	18.3	14.57	3.74	4.76	8.968
M	85	12	3.78	0	109	57	27.14	12.7	118	0.69	66.69	201	3.49	1.11	1.95	0.84	1.15068	0.73	6.7	13.6	8.18	1.87	<3.42	20.5	6.3	36.82	17.32	4.04	3.93	4.789
F	51	9	9.3	1	119	60	26.84	7.7	43	0.58	175.99	198	4.67	1.56	3.23	2.05	0.794574	2.58	8.1	11.6	8.3	1.9	5.28	19.4	6.51	11.7	37.21	5.7	4.67	8.599
M	62	7	9.82	0	130	78	28.44	28.3	79	0.99	112.99	351	5.79	1.52	3.47	3.15	1.24016	2.54	7.3	9.9	36.3	1.9	9.22	8	5.18	30.48	28.27	7.22	3.79	19.616
M	72	10	13.35	0	130	73	28.25	11.2	102	0.81	81.61	258	5.25	1.73	3.73	3.86	3.03937	1.27	11.8	11.9	52.4	1.9	5.81	8.5	8.34	21.69	40.15	4.73	2.44	12.703
M	61	16	5.8	0	142	95	21.85	10.9	80	0.67	111.73	373	5	2.51	3.14	4.03	1.45487	2.77	6.4	10.3	20.3	2	5.39	9	9.71	15.28	18.26	5.33	3.4	11.421
M	47	20	6.69	0	133	87	23.38	14.9	96	0.87	95.45	244	7.44	1.22	4.55	5.37	2.24686	2.39	9.4	10	13.2	1.9	3.42	5.1	5.38	14.49	17.3	6	3.12	28.503
M	56	10	6.63	0	152	90	27.77	4.3	105	0.59	83.06	428	4.24	5.48	2.33	4.87	3.83465	1.27	6.1	9.6	11	1.56	3.48	17.3	6.17	10.28	27.5	4.47	4.65	8.576
F	80	0.5	5.8	0	134	86	25.97	15.5	93	0.87	65.93	391	4.35	2.88	1.5	5.91	2.23864	2.64	12.1	8.6	7.22	1.88	3.98	17.2	4.28	16.47	27.28	5.11	5.37	5.012
M	35	7	10.27	1	97	61	27.1	12.2	106	1.53	91.37	265	4.95	2.12	3.33	3.97	1.63374	2.43	12.5	9.5	5.87	1.7	3.41	17.8	3.61	32.36	40.9	4.76	3.22	5.939
M	60	6	5.87	0	131	72	22.57	16	79	0.62	113.74	270	2.97	1.21	1.41	4.57	2.92949	1.56	7	10	45.6	1.9	4.93	7.5	4.49	20.5	41.52	6.24	1.99	14.02
M	66	0.05	13.09	0	113	56	19.6	13.5	101	0.78	84.01	227	5.22	0.71	3.5	2.01	1.06349	1.89	13.3	11.9	32.7	1.85	7.1	16.1	6.28	21.7	20.6	7.06	3.39	6.565
M	53	0.05	6.73	0	105	75	24.44	29.6	55	0.86	177.15	331	4.52	1.38	2.88	7.54	3.06504	2.46	8.4	9.6	5.56	1.9	3.42	24.8	6.38	22.19	27.53	5.16	2.28	4.153
F	63	2	9.17	1	150	95	24.77	11.3	45	0.86	159.98	236	4	1.05	2.5	4.63	1.24129	3.73	10.6	11.6	11.6	1.8	3.41	18.2	5.52	20.4	26.28	6.25	4.38	5.987
F	49	0.05	12.12	0	112	70	29.05	8.1	40	0.68	192.87	222	6.5	1.75	4.13	3.78	1.58159	2.39	11.6	8.9	10.9	1.88	8.72	7.1	5.98	20.47	25.16	7.07	3.37	14.934
M	26	0.05	8.5	0	128	87	30.45	10	87	0.63	120.56	456	4.41	1.63	2.86	6.17	3.58721	1.72	11	11.6	20	1.85	3.96	11.3	7.2	26.48	36.16	3.79	3.32	9.086
M	71	7	8.57	0	158	102	23.26	13.5	83	0.65	103.82	207	4.5	1.5	2	3.17	1.68617	1.88	11.8	9.8	45.3	2.3	9.57	7.4	6	19.1	35.14	6.41	4.62	14.187
M	27	0.01	8.08	0	134	79	28.57	14	92	0.7	112.18	400	3.52	1.42	1.4	5.05	2.35981	2.14	8.8	12	10.9	1.88	4.41	29.1	6.81	18.48	38.73	8.22	5.39	11.84
F	45	2	10.01	0	133	78	21.37	13.7	63	0.5	116.16	133	5.37	0.68	2.93	4.61	2.00435	2.3	12.3	8.4	11.8	1.88	3.88	13.3	5.9	17.38	26.26	7.22	1.89	8.551
F	78	19	4.6	0	135	78	28.58	6.5	53	1.07	126.83	196	4.01	2.7	2.37	3.75	1.98413	1.89	6.6		5.79	1.88	8.65	22.2	5.39	16.48	39.46	4.66	4.77	3.904
M	56	10	6.63	0	144	87	27.38	17.5	87	0.96	103.19	497	4.6	3.63	2.9	2.84	1.57778	1.8	6.4	9.3	11.8	1.88	3.96	5.7	5.31	22.39	28.46	6.37	4.02	18.534
M	41	0.01	5.92	0	118	78	26.93	12.1	66	0.53	151.21	379	6.36	3.58	4.17	3.49	1.4187	2.46	8.6	11.3	37	1.88	5.02	8.9	7.46	21.5	34.69	5.6	2.57	11.977
M	48	10	6.22	0	110	63	24.17	13	78	1.03	120.77	411	4.21	1.05	2.63	2.1	1.07692	1.95	6.5	11.6	31.1	2.01	4.54	4.3	8.28	26.38	30.26	8.57	5.07	23.846
M	66	3	7.27	0	116	59	28.4	11.3	56	0.47	165.92	300	3.72	1.73	0.75	2	1	2	6.8	12.9	6.26	1.84	<3.42	26.8	5.19	15.28	40.5	4.88	4.19	8.358
F	58	20	12.3	0	134	77	25.2	14.7	41	0.45	181.14	242	5.4	1.48	3.76	2.25	0.778547	2.89	9.8	10.8	6.23	1.8	3.34	18.7	6.92	15.37	19.47	6.04	3.05	5.452
M	50	0.1	11.32	0	137	62	25.86	19.6	75	0.9	125.31	164	3.5	1.5	1.5	2.5	1	2.5	15	8.6	《5.56	1.88	<3.42	20.3	7.38	12.45	53.49	5.15	2.39	4.983
M	45	2	8.63	1	132	84	23.53	13.1	95	0.55	97.45	260	7.99	2.36	5.54	3.14	1.16729	2.69	12.5	10.1	7.25	1.88	3.47	9.9	5.28	23.39	15.5	6.46	1.55	12.073
M	55	18	5.23	0	106	68	26.88	10.7	103	0.8	85.24	319	4.3	1.38	2.76	3.11	1.51707	2.05	6.9	11.3	8.11	1.84	4.67	9.2	3.9	14.62	36.47	5.07	3.01	15.566
M	53	1	5.94	0	109	75	21.3	10.9	80	0.53	114.94	189	3.89	0.68	2.79	4.63	2.02183	2.29	14.9	12.5	29	2	《3.42	8.6	7.45	25.2	39.52	4.91	4.43	12.211
F	66	20	7.7	0	147	86	22.77	9.6	71	0.77	93.63	280	8.28	1.48	5.6	4.14	2.97842	1.39	9.4	11.6	《5.56	1.88	《3.42	19	7.34	24.61	30.29	5.11	5.07	4.365
M	48	4	10.1	0	144	93	26.53	7.4	76	0.71	124.45	366	5.79	8.04	3.09	6.51	1.53176	4.25	8	11.6	28.9	2.35	9.54	18.6	4.52	1	47.81	3.23	8.56	16.383
M	69	5	6.74	0	158	78	23.88	18.5	77	0.7	113.86	220	5.9	1.1	3.5	3.52	3.00855	1.17	7.9	11.3	8.87	1.88	《3.42	21.5	6.53	19.02	51.74	7.4	11.86	4
M	28	0.01	10.19	0	123	81	17.99	18.4	77	0.7	136.74	300	3.4	0.42	2.05	3	1	3	12.2	8.7	《5.56	1.86	《3.42	23.8	6.47	18.03	24.39	5.34	7.47	6.565
M	53	1	6.47	0	159	88	29.67	12.2	57	0.66	169.99	324	4.58	2.37	2.92	2.32	1.26087	1.84	6.6	14.3	13.9	1.87	4.22	10.5	6.57	21.29	19.37	5.27	4.21	9.307
M	35	0.5	7.12	0	105	86	24.57	11.3	71	0.83	143.53	380	4.79	3.97	3.01	2.88	0.947368	3.04	8.9	11.5	12	1.9	3.36	6.5	6.77	10.87	30.73	3.83	1.17	16.302
F	29	0.5	7.53	0	115	82	29.38	11.1	85	0.5	89.88	430	5.11	1.37	3.32	3.63	1.46964	2.47	9.6	12	12	1.8	8.5	12.4	5.6	19.52	41.55	4.11	1.32	15.52
M	65	20	4.87	1	135	71	27.44	12.8	79	1.07	111.91	377	4.62	2.54	2.96	3.11	1.65426	1.88	8.6	10.8	9.74	1.8	《3.42	18.3	5.5	2.56	44.68	3	7.12	5.355
M	77	4	5.42	0	122	64	23.03	15.2	87	1.05	96.73	337	6.09	0.79	4.5	4.35	3.65546	1.19	8.6	13.4	13.9	1.7	《3.42	15.4	7.07	4.13	32.55	4.16	1.3	6.316
M	64	3	4.84	0	153	73	26.73	14.4	62	0.54	148.48	315	4.5	1.08	2.96	4.47	2.44262	1.83	7.2	13.4	17.4	1.7	9.47	5.4	5.06	15.88	15.6	7.95	1.34	18.027
M	81	20	6.08	0	155	77	30.86	11.6	78	0.83	108.6	506	3.06	1.52	1.2	2.53	2.43269	1.04	7.1	13.4	《5.56	1.7	《3.42	22.9	6.3	0.89	37.61	4.32	1.24	4.282
F	69	20	8.48	0	152	79	20.9	9.6	76	1	85.77	276	3.93	1.29	2.58	1.83	1.25342	1.46	8	10.7	7.13	1.7	3.37	20.4	7.28	6.23	35.14	7.42	5.46	5.152
F	70	14	7.48	1	146	74	28.2	15.7	93	0.62	67.75	224	1.94	1.17	0.35	6.65	3.88889	1.71	8.5	10.6	25.6	1.86	7.82	4.9	6.47	10.29	20.75	9.02	4.21	25.229
F	72	5	9.13	1	128	78	23.14	11.2	43	0.67	164.09	386	3.69	1.1	2.17	2.71	1.1681	2.32	7.7	11.3	《5.56	1.6	4.86	16.7	6	10.2	18.04	3.96	2.55	5.737
M	67	1	5.18	0	135	74	28.04	17.02	75	0.97	118.09	385	3.76	0.95	2.47	2.98	2.31008	1.29	9.3	11.2	6.73	1.6	《3.42	9.7	4.52	4.1	48.72	2.88	8.36	9.989
F	45	1	5.43	1	117	65	25.67	6.6	46	0.5	167	221	3.98	1.25	2.56	2.01	2.09375	0.96	9.9	14.2	20.5	1.8	《3.41	16.8	5.76	25.76	17.02	4.37	1.09	8.578
F	48	20	5.77	0	132	85	25.06	13.2	79	0.22	88.3	274	4.55	0.97	2.67	1.98	1.51145	1.31	6.6	12	7.49	1.6	3.17	26.6	5.19	8.39	40.34	5.33	4.16	19.038
F	76	10	8.61	0	136	78	26.17	5.6	74	0.79	86.74	255	4.83	1.03	2.79	3.37	1.3062	2.58	8.5	11.9	23.7	1.7	4.7	12.2	4.67	40.46	135.81	10.55	5.13	8.841
F	29	0.01	10.62	0	140	81	28.68	11.5	71	0.8	110.63	300	5.27	2.41	3.48	4.66	1.53289	3.04	10.5	13.5	14.6	1.84	3.47	6.5	5.78	17.28	50.9	8.21	6.25	20.567
M	49	3	7.17	1	139	87	27.28	11.1	60	0.57	162.8	309	4.81	3.81	3.19	1.69	0.960227	1.76	10.7	11.2	12	1.7	5.65	9.9	6.61	42.43	18.04	4.51	1.82	`15.268
F	50	12	16.19	0	104	76	17.86	21.1	57	1.35	127.62	212	4.23	0.71	2.46	2.17	1.4	1.55	10.8	14.6	11.7	1.7	《3.41	28.2	6.22	5.37	17.83	5.49	3.67	3.618
M	53	0.1	5.28	1	113	69	28.37	8	38	1	271.42	361	2.63	1.16	1.62	2.03	1.0914	1.86	6.7	14.5	13.6	1.8	4.65	16.7	6.77	15.67	16.61	14.25	11.86	5.855
M	61	10	9.22	0	119	83	28.2	20.6	59	0.75	158.76	288	3.81	0.87	2.65	2.99	1.40376	2.13	10.8	11.6	9.56	1.9	4.6	11.7	6.77	17.21	16.2	4.82	1.21	8.707
M	45	7	7.81	0	136	96	30.04	13.4	60	0.56	165.63	356	4.91	4.31	3.03	3.7	0.852535	4.34	8.3	10.3	6	1.84	《3.41	12.9	7	29.91	18.44	4.89	1.37	10.076
F	65	5	7.34	0	151	83	29.71	16.5	78	0.75	84.25	239	4.36	1.18	2.9	2.58	1.18894	2.17	9.7	14.5	22.3	1.8	6.08	10.8	8.69	45.66	52.55	5.46	1.3	9.458
F	54	8	7.5	0	113	69	22.85	6.1	43	0.45	173.96	281	5	1.08	3.12	1.73	0.96648	1.79	7.5	9.7	《5.56	1.9	《3.41	4.1	5.84	5.38	15.18	3.46	1.59	2.471
F	71	5	9.09	0	156	71	29.05	10	83	1.1	77.03	351	4.09	2.23	2.44	4.45	2.06019	2.16	11.1	14.6	30.7	1.87	8.35	21	6.77	19.54	26.06	4.45	4.26	10.712
M	24	0.01	6.8	0	135	86	41.58	25	85	0.99	125.89	506	5.39	2.96	3.49	4.14	1.207	3.43	10.1	11.9	14.3	1.9	3.68	10.5	5.61	22.71	49.3	9.22	5.57	13.779
F	50	3	6.81	0	138	92	22.15	5.8	70	0.94	100.7	237	6.87	5.36	4.09	1.75	1.2069	1.45	9.8	10.8	《5.56	1.6	《3.42	17.4	6.22	15.9	36.42	3.29	3.18	7.594
M	55	4	7.66	0	108	72	21.77	15.7	91	0.88	98.34	285	4.35	0.91	2.85	2.93	1.65537	1.77	11	17.3	8.89	1.9	4.16	20.4	7.77	15.39	32.1	5.33	4.09	21.108
F	57	0.01	5.84	0	130	78	27.59	23.1	52	0.42	138.16	180	5	1.32	3.05	4.31	1.57299	2.74	11.2	10.7	7.72	1.7	3.18	19.2	8.37	30.24	33.56	6.27	2.76	5.516
M	42	15	5.69	1	143	79	26.18	7.8	68	0.67	145.38	265	4.05	0.71	2.66	3.39	1.18531	2.86	6.2	11.3	8.63	3.9	4.34	7.9	4.65	16.23	19.42	8.08	3.06	13.277
F	36	8	11.03	0	125	79	30.93	8.4	80	0.52	92.26	446	4.58	7.05	2.72	5.36	3.39241	1.58	8.8	10.1	8.6	1.8	3.25	16.5	6.26	14.26	40.18	3.58	3.9	6.172
F	64	10	13.67	0	136	63	21.78	13.3	67	0.64	100.73	100	5.07	1.85	3.29	2.15	1.53571	1.4	9.5	9.9	21.5	1.8	8.69	14.8	6.48	16.23	41.37	5.66	4.78	9.213
F	27	0.2	9.13	0	118	83	22.05	17.4	79	0.52	99.23	302	5.26	1.59	3.57	3.09	1.6978	1.82	10.8	10.7	12.4	1.9	5.63	7	7.39	14.28	20.29	4.33	4.22	23.579
M	22	0.2	11.96	0	133	92	27.6	11.8	87	0.59	124.73	266	10.31	7.34	5.2	4.77	2.20833	2.16	12.9	15.3	13.7	2.05	3.78	25	5.77	41.17	36.4	5.93	5.15	5.519
F	59	19	8.73	1	123	75	23.83	12	39	0.61	191.24	287	4.16	1.69	2.76	1.63	0.920904	1.77	8.5	11.2	6.31	1.8	3.18	20.4	5.06	9.29	35.49	6.7	3.26	5.042
M	49	7	5.02	1	108	71	23.88	13.6	70	0.68	136.27	438	5.35	5.46	3.35	3.32	1.40678	2.36	6	11.8	10.1	1.9	3.16	7.6	5.5	9.3	20.18	5.62	6.02	15.573
M	63	4	8.07	1	118	71	27.97	7.1	77	1.06	116	287	4.66	1.47	3.23	2.27	1.31214	1.73	10.7	10.7	28.2	1.7	5.74	9.4	5.14	25.9	13.45	4.67	2.29	16.21
F	30	5	7.56	0	115	78	26.84	14.1	60	0.6	133.43	270	5.42	2.08	3.65	5.14	1.52976	3.36	11	10.2	5.51	1.9	3.15	17.7	5.53	38.03	29.71	2.76	1.29	5.888
F	69	5	6.8	0	123	69	25.1	7.8	40	0.77	179.92	213	3.02	0.73	1.85	4.82	1.94355	2.48	7.2	10.7	7.68	1.7	4.73	17.2	9.76	5.31	37.81	3.45	1.85	6.172
F	66	6	6.6	0	124	73	26.25	10.8	90	0.71	71.21	436	3.27	1.19	2.19	3.35	2.01807	1.66	8.7	10.1	8.15	1.6	3.38	19.3	5.76	7.57	14.57	3.41	2.8	8.078
F	74	7	6.1	0	104	74	25.24	13.4	56	0.74	120.3	289	3.53	1.34	2.03	2.92	1.46734	1.99	10.6	11.8	12	1.9	5.26	17.3	6.92	29.75	22.1	2.93	1.19	8.229
F	61	13	8.02	1	128	76	27.73	6.9	65	1.11	105.35	434	4.4	0.88	2.86	1.41	0.921569	1.53	10	10.7	8.11	1.8	4.35	20.2	7.38	36.93	10.39	4.37	1.8	6.238
M	53	0.3	6.07	0	105	74	27.73	6.1	93	0.9	96.61	332	3.44	0.99	2.02	3.35	2.13376	1.57	7.9	11.2	10.1	1.7	3.75	5.3	5.6	4.97	14.47	12.27	12.54	18.651
F	51	15	7.3	0	135	94	27.92	12.1	67	0.9	105.48	353	4.55	1.43	2.9	1.79	1.09816	1.63	8.2	10.8	10.1	1.7	3.91	5.5	6.03	9.63	15.54	4.69	3.68	21.444
F	67	6	7.48	1	131	78	30.36	7.4	44	0.99	162.15	287	5.89	1.69	4.14	2.6	1.44444	1.8	8.5	11.1	7.48	1.8	3.4	16.5	7.31	12.91	17.02	5.84	2.19	6.378
M	55	1	7.37	0	123	79	27.44	7.1	73	0.88	126.81	369	4.92	3.33	3.18	4.79	1.38439	3.46	7.7	8.9	7.08	1.6	3.15	13.7	6.6	18.31	30.15	6.62	5.23	8.739
M	37	4	7.54	0	112	90	24.91	18.4	70	1.02	144.26	297	4.74	1.17	3.16	1.5	0.789474	1.9	10.8	8.6	9.34	1.88	《3.41	6.9	7	17.28	33.68	5.12	4.08	14.844
M	78	10	9.35	1	165	83	22.44	19	138	1.65	56.65	361	3.91	0.74	2.5	4.9	2.37864	2.06	9.7	12.8	88.5	1.9	11.7	5.8	6.61	30.34	40.33	9.2	12.76	24.596
F	49	6	3.47	0	136	83	20.58	46.6	66	1.05	108.12	282	2.9	0.54	1.55	2.9	1.90789	1.52	6.4	10.3	《5.56	1.88	3.41	15	7.15	12.76	51.64	5.47	1.87	7.007
M	61	12	6.11	0	145	76	21.91	9.9	78	0.61	115.02	249	4.49	1.31	2.85	7.05	7.05	1	11.2	13.1	7.73	1.8	《3.41	9.8	7.77	23.24	77.5	16.66	10.24	10.061
M	77	26	14.46	0	151	65	26.89	6.4	57	0.69	157.58	265	3.7	1.3	2.44	3.78	1.54918	2.44	6.6	11.6	36	2.01	5.04	25	5.53	30.97	49.5	4.98	6.19	5.758
M	29	0.1	6.4	0	156	108	36.23	15	64	0.66	168.09	418	6.48	3.01	4.62	4.34	1.46128	2.97	11	11.8	31.2	1.9	5.38	20.2	5.67	71.07	33.89	13.62	4.06	9.578
F	50	8	7.4	0	109	63	24.84	9.5	59	0.46	122.64	201	4.43	3.03	2.9	2.85	1.95205	1.46	10.3	9.8	5.54	1.7	3.16	18.8	5.45	21.18	15.39	3.6	3.68	5.466
F	76	6	4.3	0	130	84	27.24	14.7	122	0.59	104.45	425	2.66	0.52	1.37	1.24	1.72222	0.72	5.4	10.1	5.87	1.8	3.17	8.4	7.23	7.71	14.57	5.98	7.1	14.524
F	52	0.2	7.84	0	133	71	23.45	7.4	97	0.82	68.55	249	4.75	1.24	3.27	2.82	1.1417	2.47	11.4	10.8	7.18	1.7	3.18	21.6	7.31	23.8	28	7.95	10.54	9.631
F	53	1	11.78	0	128	90	26.06	11.5	108	0.59	60.32	205	2.99	1.96	1.78	2.49	1.10667	2.25	12	10.1	14.3	1.9	4.17	12.1	6.3	14.36	37.6	5.32	6.33	8.106
M	21	13	7.95	1	130	75	21.47	13.3	71	0.64	159.21	316	3.73	0.6	2.06	2.73	1.69565	1.61	9.1	10.5	5.76	1.9	<3.41	15.3	5.45	28.62	15.29	8.66	2.46	6.649
F	17	5	3.08	0	129	74	18.62	20.8	44	0.93	288.68	232	2.72	0.42	1.39	1.9	0.840708	2.26	5.8	11.3	《5.56	1.87	<3.41	16	5.68	0.63	32.45	2.83	1.29	6.194
M	52	10	11.53	0	137	88	30.44	14.1	56	0.73	174.17	366	3.75	4.52	2.16	6.34	3.23469	1.96	8.6	10.7	8.94	1.6	3.18	18.8	6.13	17.27	24.61	7.43	4.04	5.489
M	34	4	10.24	1	149	91	34.88	18.7	72	0.6	142.04	495	4.335	3.14	2.82	7.28	2.44295	2.98	6.9	9.6	《5.56	1.9	3.4	13.7	5.71	16.32	27.58	6.04	4.55	8.694
M	50	7	9.43	0	101	66	23.74	9	68	0.8	140.32	274	4.97	1.07	3.25	3.13	1.83041	1.71	11.5	10.3	29.5	1.8	6.6	6.2	4.69	18.26	30.47	4.15	3.35	16.673
M	70	20	5.24	0	147	78	24.11	16.3	81	1.01	107.09	473	4.54	1.1	2.73	3.94	1.79091	2.2	7	10.6	10	1.85	《3.41	16.7	7.17	40.12	50.37	6.74	6.11	4.916
M	54	14	16.74	0	99	62	26.64	15.8	54	0.4	180.26	194	5.21	0.93	3.44	2.92	1.14062	2.56	11.6	10.9	5.79	1.75	《3.41	14.9	6.37	20.53	35.14	3.29	5.34	5.759
M	77	11	12.63	0	143	93	29.07	11.7	88	0.83	95.45	396	4.07	1.8	2.75	3.03	1.38991	2.18	9.1	9.6	7.15	1.8	3.19	15.8	5.25	26.35	32.3	6.1	3.66	6.642
M	65	1	6.77	0	155	81	22.84	23.1	58	0.6	159.85	251	5.62	0.94	3.59	2.38	1.17241	2.03	12.8	10	20.3	1.9	4.96	19.1	7	7.81	21.29	3.41	3.96	5.496
M	55	1	6.26	0	113	75	27.74	14.6	86	0.69	104.95	181	5.03	2.4	2.99	1.44	0.70936	2.03	6	11.6	《5.56	1.74	《3.41	12.7	4.8	23.16	35.2	5.22	4.28	7.905
M	44	4	4.2	0	128	63	18.5	25.3	66	0.6	149.06	192	2.93	0.47	1.62	2.22	1.07767	2.06	6.5	11.1	16.9	1.9	4.36	8	5.37	33.74	35.58	4.63	6.21	15.425
M	66	17	8.46	0	125	68	26.03	14.3	103	0.99	82.13	325	3.88	2.31	2.48	6.18	2.36782	2.61	8	10.9	11.7	1.88	4.76	14.5	5.85	38.24	30.36	9.01	5.76	7.256
F	46	6	12.11	0	111	75	29.24	5.7	50	0.5	150.99	316	4.14	1.71	2.88	2.41	1.82576	1.32	7.5	9.6	11.4	1.9	11.1	14	9.23	18.42	29.37	4.23	10.33	12.177
F	64	3	17.17	0	121	76	19.53	12	41	0.6	177.56	97	4.86	2.01	2.82	2.23	1.23204	1.81	13	8.3	11.7	1.84	《3.42	20.2	7.38	3.96	54.27	8.28	6.16	4.103
F	66	20	3.25	0	162	78	25.91	16	52		132.12	258	4.68	0.73	2.99	3.73	1.54772	2.41	8.1	11.5	22.9	2	4.19	7.1	7.23	19.94	19.66	4.16	3.66	14.914
F	60	7	5.42	0	125	60	18.97	8.8	41		179.9	246	3.86	0.69	2.39	2.08	0.74552	2.79	6.9	10.9	5.52	1.8	3.26	27.3	9.53	27.56	17.63	5.93	6.26	3.81
