# Supplementary material for: The role of serum and urinary biomarkers in the diagnosis of early diabetic nephropathy in patients with type 2 diabetes
Source: PeerJ. 2019 Jun 11;7:e7079. doi: 10.7717/peerj.7079 (PMC6568248; doi:10.7717/peerj.7079)
Supplement: Supplemental Information 4 — Raw data showed gender, age, duration of diabetes, fundus lesions,blood pressure,BMI,FBG,TC,TG,LDL,TBIL,Scr,CysC,eGFR,UA, NC,LC,NLR,HbA1c, Tf,NAG,IgG,α1MG,Ucr,PCX,NGAL,8-OHdG,TNF-α,IL-18and UACR index of all the participants in the macroalbuminuria group. [file peerj-07-7079-s004.xls]

## Sheet: Sheet1
Sex	Age	Duration	FBG	DR	SBP	DBP	BMI	TBIL	Cr	Cysc	eGFR	UA	TC	TG	LDL	N	N/L	L	HbA1c	NAG	α1MG	Tf	IgG	UACR	TNF-α	NGAL	IL-18	8-OHdG	PCX	uCr
F	67	7	17.69	1	200	104	20.5	10.1	99	1.1	63.6	165	3.59	0.72	2.09	6.5	4.33333	1.5	20.2	28.5	145	36.1	132	353.3	7.06	25.2	49.36	23.6	7.54	16.87
F	76	10	5.54	0	174	83	27.56	7.4	294	2.68	17.65	216	2.99	0.61	1.9	5.68	5.16364	1.1	6.7	20.1	151	42.1	238	1425.5	9.44	43.14	65.23	15.42	6.36	6.528
M	55	3	7.29	0	182	94	21.26	9.3	48	1.2	205.73	268	16.74	15.53	2.97	6.36	2.22378	2.86	7.1	48.4	43.7	64.1	172	654.4	8.06	32.07	56.29	8.97	7.47	16.197
M	51	10	12.95	1	101	62	22.72	7.9	60	0.77	161.48	311	5.09	1.38	3.31	6.18	1.6748	3.69	9.8	18.5	20.8	10.3	16.6	311.2	7.69	28.26	36.87	16.48	6.79	10.282
F	79	38	3.68	1	154	67	30.08	7.2	57	1.26	116.32	426	4.16	1.56	2.29	3.99	1.83871	2.17	8.6	11.9	5.56	7.27	8.21	347	7.1	25.14	40.25	17.56	7.28	3.89
F	67	16	9.89	1	145	77	30.39	8.7	100	0.76	62.86	221	5.84	3.09	3.56	3.91	2.57237	1.52	11.8	22.5	35.7	17.7	18.16	587.5	9.42	36.28	55.5	20.07	6.66	5.038
M	50	10	9.43	0	130	81	29.06	13.5	64	1.04	150.49	355	3.91	268	2.51	7.57	1.7088	4.43	10.3	23.6	11.5	40.2	76.8	777.2	9.25	41.36	53.21	14.13	7.7	7.064
F	72	10	13.99	0	112	83	25.15	10.9	148	2.46	39.41	392	6.6	3.95	4.38	4.84	1.936	2.5	10.4	26.9	71.8	71.6	202	1640.2	9.56	50.68	66.3	8.36	6.2	5.036
M	62	20	5.87	1	158	98	25.53	15.4	109	1.53	77.93	369	5.37	1.41	3.1	2.97	0.916667	3.24	6.8	101.3	59.1	108	208	2337.7	8.1	58.37	70.16	19.21	5.64	5.775
M	71	30	3.21	1	154	71	24.91	8.8	177	1.98	43.33	505	1.79	0.83	0.97	3.71	2.30435	1.61	6.8	20.8	66.3	16.3	41.8	305.9	7.05	26.1	30.57	26.23	8.87	10.004
M	71	17	10	1	137	79	25	7.4	101	0.95	82.77	209	3.67	1.1	2.5	9.41	6.91912	1.36	8.1	39.5	77.5	47	153	628.2	7.23	40.36	48.16	15.33	6.28	9.918
M	44	16	8.48	1	142	98	27.41	9.2	88	0.9	106.95	446	4.97	3.29	3.19	2.32	0.822695	2.82	11.8	26	15.5	26.8	39.8	489	7	25.13	40.21	8.69	9.06	10.389
F	37	5	8.01	1	131	72	20.72	5.6	204	3	31.15	492	10.73	2.15	6.92	3.76	3.68627	1.02	9.4	44.3	52.6	196	248	5440.4	9.13	65.47	56.2	19.77	6.69	3.86
M	44	8	5.77	1	154	96	24.69	6.8	61	1.1	163.25	422	8.09	3.62	5.11	2.2	0.748299	2.94	10	34.6	5.56	275	466	4903.6	7.01	66.28	78.37	20.58	7.32	8.402
M	52	0.5	9.92	1	123	92	25.53	9.8	122	1.44	70.91	327	5.77	2.07	3.94	3.69	1.44706	2.55	9.7	63.5	61.1	230	342	1270.6	10	17.86	29.29	8.42	8.73	9.896
M	56	20	3.33	1	175	93	20.24	6.5	366	3	19.67	353	5.39	1.15	3.46	4.92	4.64151	1.06	5	56	143	110	324	3460.3	8.91	58.62	64.47	5.41	9.31	5.462
M	29	2	11.31	0	157	91	28.95	9.3	72	0.59	146.73	373	5.5	2.5	2.5	3.62	1.70755	2.12	9.8	63.7	17	82.1	105	1206.9	10	40.01	93.64	78.92	6.1	8.7
F	34	10	9.52	0	113	80	32.46	13.2	81	0.58	92	384	8.68	17.01	3.35	7.88	2.43963	3.23	9.3	47.3	7.85	18.3	22.4	349.1	9.18	10.51	35.82	3.59	14.76	9.567
M	53	10	8.76	1	166	93	25.31	7.5	115	2.27	75.62	312	7.99	1.37	5.4	6.36	4.38621	1.45	7	34.7	67.2	229	620	7885.3	7.83	241.54	108.63	64.89	7.07	4.743
M	47	8	5.33	1	139	77	26.78	3.1	268	1.81	29.19	351	4.96	2.25	3.03	1.86	1.82353	1.02	5.4	39.5	73.4	219	629	5372.8	10.2	65.26	84.3	22.56	6.99	4.225
M	58	8	9.4	1	150	86	20.7	16.3	76	0.66	119.74	288	5.22	1.76	3.38	2.49	1.18571	2.1	8.2	56.5	17.2	23.5	34.3	487.5	8.37	10.88	29.53	7.41	5.9	8.41
F	70	7	23.68	1	136	72	23.74	14.5	105	1.09	83.01	237	4.57	1.88	2.68	3.63	1.48163	2.45	10.8	34.5	38.6	24.6	65.5	424.4	8.77	27.74	33.16	5.9	1.24	12.347
F	69	2	14.21	1	161	74	27.33	10.6	100	0.75	62.49	202	4.3	1.72	2.72	4.51	2.33679	1.93	10.5	23.5	26.5	35	104	601.7	8.1	35.1	56.75	18.63	6.44	8.027
M	54	0.1	6.86	1	131	90	22.91	12.6	132	1.04	64.24	338	4.59	1.61	3.07	3.3	1.81319	1.82	11	83.5	34.2	28.3	49.1	827.9	8.18	37.25	65.37	22.54	5.38	7.791
M	58	8	12.88	1	108	91	22.86	9.2	131	0.8	63.88	272	5.01	1	2.97	5.16	3.08982	1.67	6.4	22.4	45.6	15.9	32.6	373	7.42	24.15	25.64	9.2	6.23	10.428
M	55	22	10.79	1	151	85	24.98	5.6	166	2.07	49.13	436	6.5	2.5	3	5.56	7.83099	0.71	16.1	71.3	84.2	84	185	3495.2	7.02	78.59	234.87	19.05	7.39	4.778
F	72	7	6.36	0	129	75	25.15	7.8	91	1.09	69.07	381	4.43	0.58	3.07	4.54	3.98246	1.14	8.7	25.8	27.1	9.56	19.4	337.5	7.15	26.03	25.15	4.38	7.5	7.555
M	77	37	9.09	1	133	65	27.76	9.6	150	2.12	51.59	194	5.3	0.97	3.46	5.58	3.79592	1.47	7.7	20.3	30.5	12.9	17.1	402.4	10.66	18.04	23.45	5.52	7	5.095
F	77	10	11	1	110	67	28.35	4.5	100	0.65	61.12	368	4.11	1.17	2.48	2.62	1.89855	1.38	8.9	39.8	124	28.9	76.6	441.5	8.1	33.21	53.17	11.27	8.33	13.499
F	66	10	9.57	0	176	95	25.56	5.7	95	0.73	66.9	189	4.09	2.06	2.29	6.9	3.09417	2.23	7.3	15.6	48.7	18.4	59.4	315.3	6.45	28.12	44.26	13.46	5.22	10.53
F	77	20	8.62	0	166	57	23.61	9.3	81	2.5	77.93	195	0.62	2.88	1.39	2.62	1.36458	1.92	11.8	26.6	43.9	1.9	13.5	520.1	8.73	43.1	56.26	28.86	6.45	4.134
M	64	20	7.11	1	138	75	29.05	10.9	123	1.12	77.73	304	4.8	1.52	2.2	6.7	2.90043	2.31	8.7	26.9	20.3	27.1	65	920.1	8.47	46.98	65.37	11.26	8.27	6.01
F	32	20	2.8	1	185	89	22.48	4.8	623	5.8	8.85	492	3.25	0.55	1.66	3.05	8.71429	0.35	4.9	96.6	186	123	209	5968.3	10.5	68.35	70.49	17.76	6.73	3.971
M	57	18	9	0	140	80	33.22	9.7	79	1.13	114.93	381	5.1	5.79	3.14	4.65	1.73507	2.68	7	36.9	27	18.8	48.6	376	7.69	6.83	53.55	8.28	5.76	5.718
F	40	10	7.93	1	169	108	34.85	11.7	117	1.44	58.24	337	3.18	1.44	1.92	3.96	1.85047	2.14	9	59.3	39	77.1	64.8	2903.7	9.58	57.12	68.57	9.34	7.14	4.236
M	44	15	11.33	1	143	93	22.21	6.1	219	1.39	32.63	408	7.04	0.87	3.45	4.19	1.43003	2.93	9.6	86.3	52.8	11.3	17.1	4649.2	9.27	55.21	63.2	11.54	6.84	3.549
F	62	2	5.75	1	149	74	21.91	9.6	48	0.65	149.98	245	7.32	3.62	4.58	5.05	1.85662	2.72	8.3	36.2	98.3	524	699	8169.3	9.37	66.7	80.25	22.78	6.77	9.193
F	66	8	9.42	0	154	92	32.04	16.2	43	1.06	167.01	289	5.48	1.42	3.51	2.5	1.73611	1.44	8	13.6	17.6	33.7	73.2	1936	9.16	40.1	50.35	27.88	7.88	2.686
M	76	8	8.44	0	167	85	24.17	11	273	2.82	25.92	479	3.33	1.23	2.03	1.42	4.17647	0.34	8.2	11.6	54.6	1.9	3.4	1965.1	8.26	35.68	56.54	13.67	4.9	5.903
M	75	7	9.92	0	151	57	22.49	7.3	106	1.5	77.43	473	6.36	2.81	4.38	3.34	1.9881	1.68	7.2	33.5	63.6	100	210	4018.3	10.37	47.92	50.39	16.96	5.17	5.475
M	66	9	11.35	1	140	80	26.4	9.2	134	1.28	60.63	425	4.94	4.5	2.98	3.28	1.98788	1.65	6	82.9	76	69.6	176	1357.3	8.26	44.44	43.33	24.57	8.47	9.799
M	60	10	13.7	1	162	59	23.62	3.7	181	1.6	47.57	412	5.32	1.91	3	6.12	3.57895	1.71	6.7	56.8	50.3	60.3	130	5284.7	10.45	60.54	77.6	22.49	7.1	4.7
F	61	2	13.4	1	136	59	23.05	16.1	89	0.87	73.29	265	3.19	1.34	2	18.02	29.0645	0.62	11.2	45.2	26.8	10.2	26.4	696.4	7.02	26.73	55.36	11.42	7.38	2.599
F	56	10	8.93	1	173	103	29.3	8.1	67	0.81	103.49	220	4.08	0.7	2.76	7.3	4.47853	1.63	8.4	22.3	27	5.79	10.5	608.5	7.99	25.37	47.46	21.56	7.26	2.12
M	64	10	5.09	1	140	75	25.65	18	73	0.78	122.97	333	4.16	1.89	2.25	2.34	0.970954	2.41	6.7	13.6	63.8	57.1	40.3	975.7	8.38	40.46	55.67	15.69	8.11	8.435
M	47	20	9.27	0	133	88	20.96	5.4	128	0.89	68.47	368	5.78	2.01	3.66	3.54	1.4449	2.45	6.4	55.6	64.1	112	199	5426.6	10.14	56.2	78.57	26.54	7.02	3.575
M	54	20	5.64	1	162	78	23.62	3.6	261	2.35	29.26	345	3.72	0.53	2.56	6.5	5.2	1.25	6.6	58.4	136	210	813	5163.8	8.23	62.64	47.83	14.05	9.07	5.984
F	76	20	8.64	1	170	79	24.97	20.6	111	0.63		432	5.11	1.8	3.61	3.72	2.65714	1.4	10.8	22.3	21.1	4.79	6.69	348.8	8.77	9.26	35.82	10.69	2.87	2.615
F	51	16	22.18	1	144	94	20.11	6.3	104	1.3	63.5	362	4.72	1.4	3.2	3.72	2.53061	1.47	11.8	23.6	46.9	19	40.6	351	7.56	18.42	28.32	21.36	5.95	6.125
